# Supplementary material for: New biomarkers for early diagnosis of Lesch-Nyhan disease revealed by metabolic analysis on a large cohort of patients
Source: Springer Nature journal article supplement (doi:10.1186/s13023-014-0219-0), 2015-01-23
Supplement: MOESM1 [file 9776016]

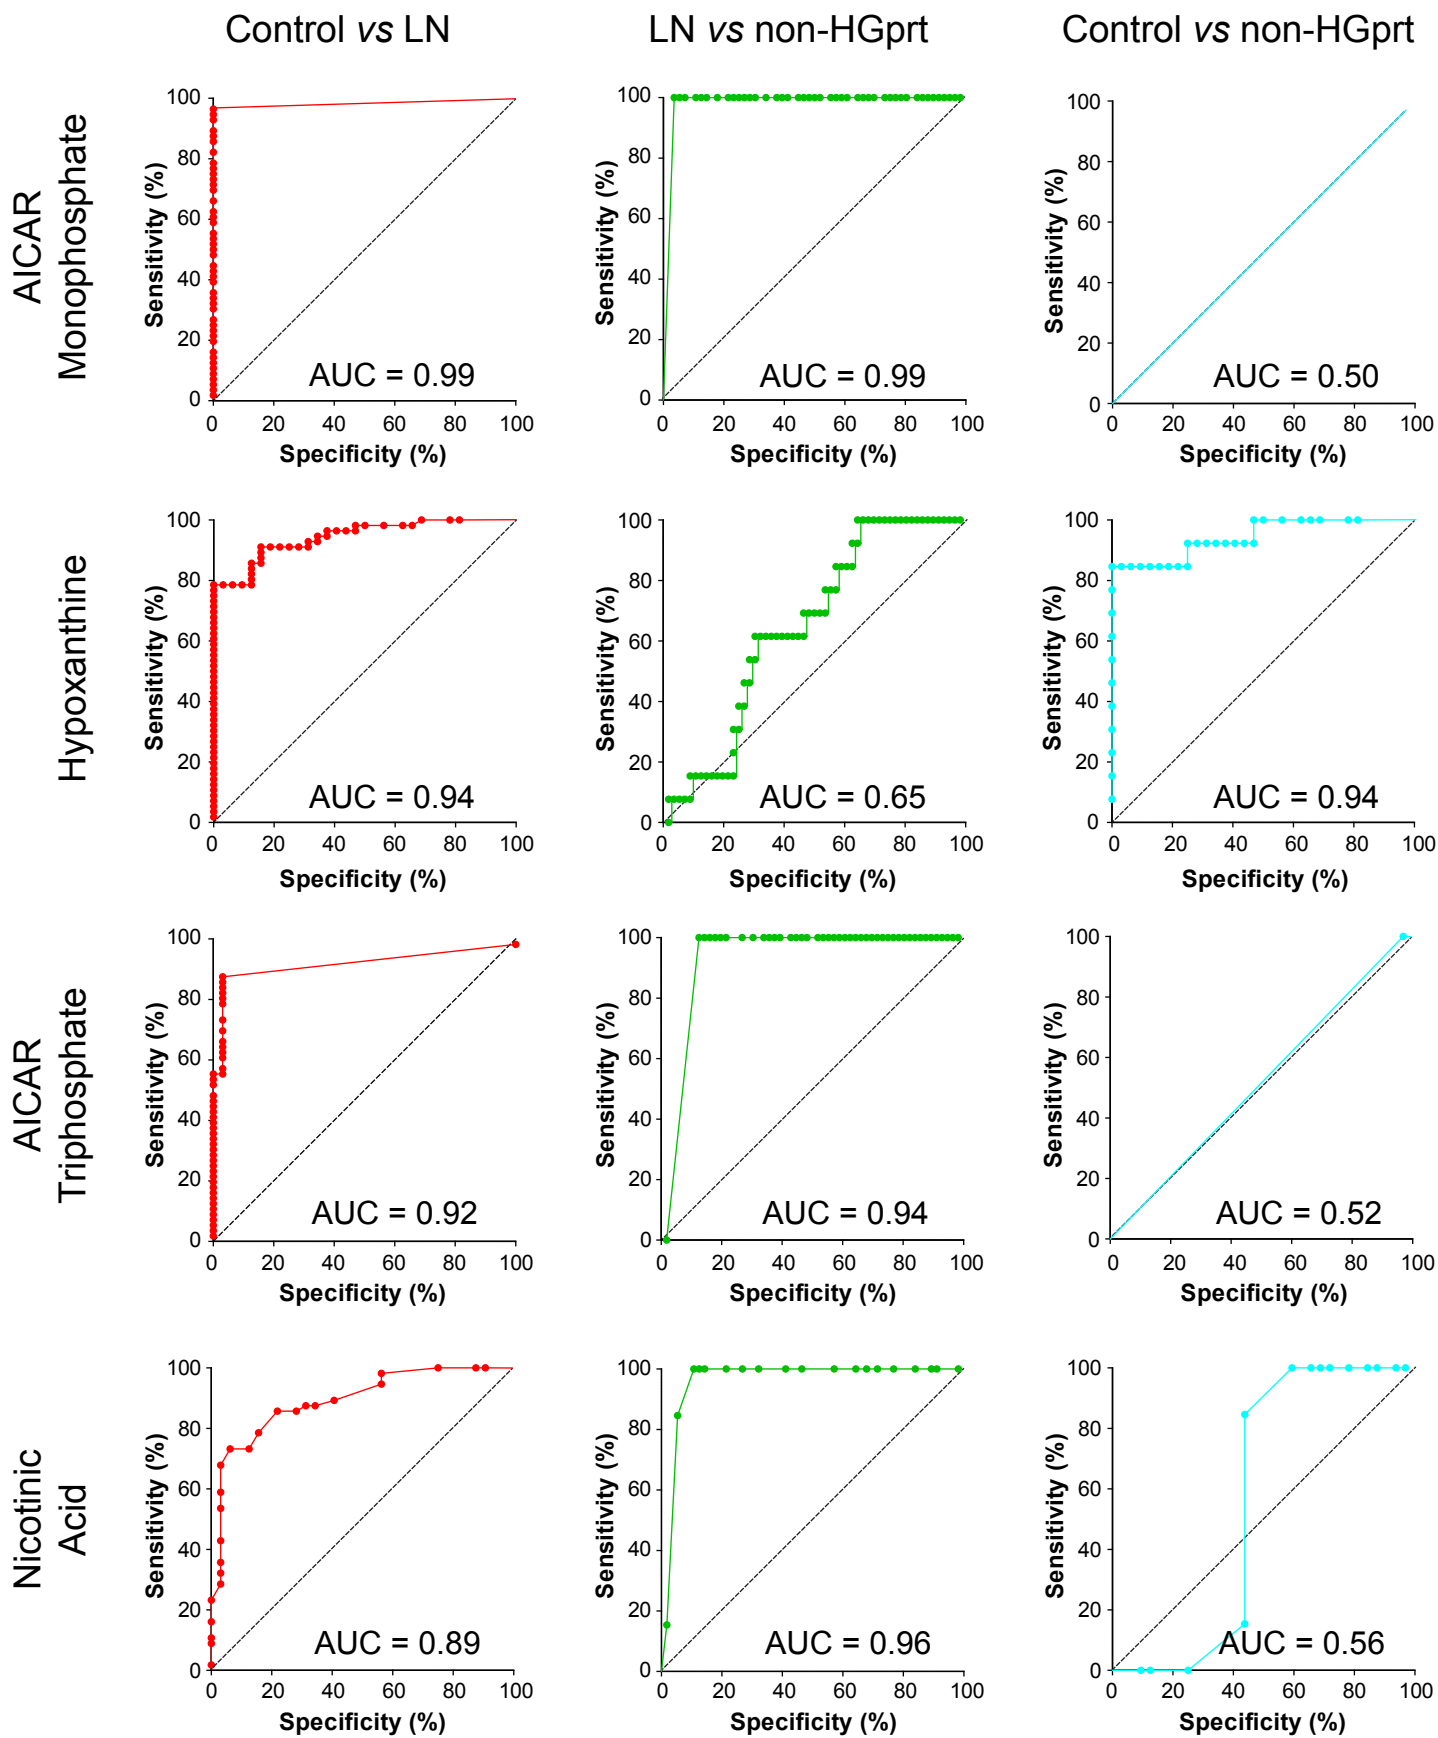

Ceballos-Picot *et al*  
Supplemental Figure 1 Part A

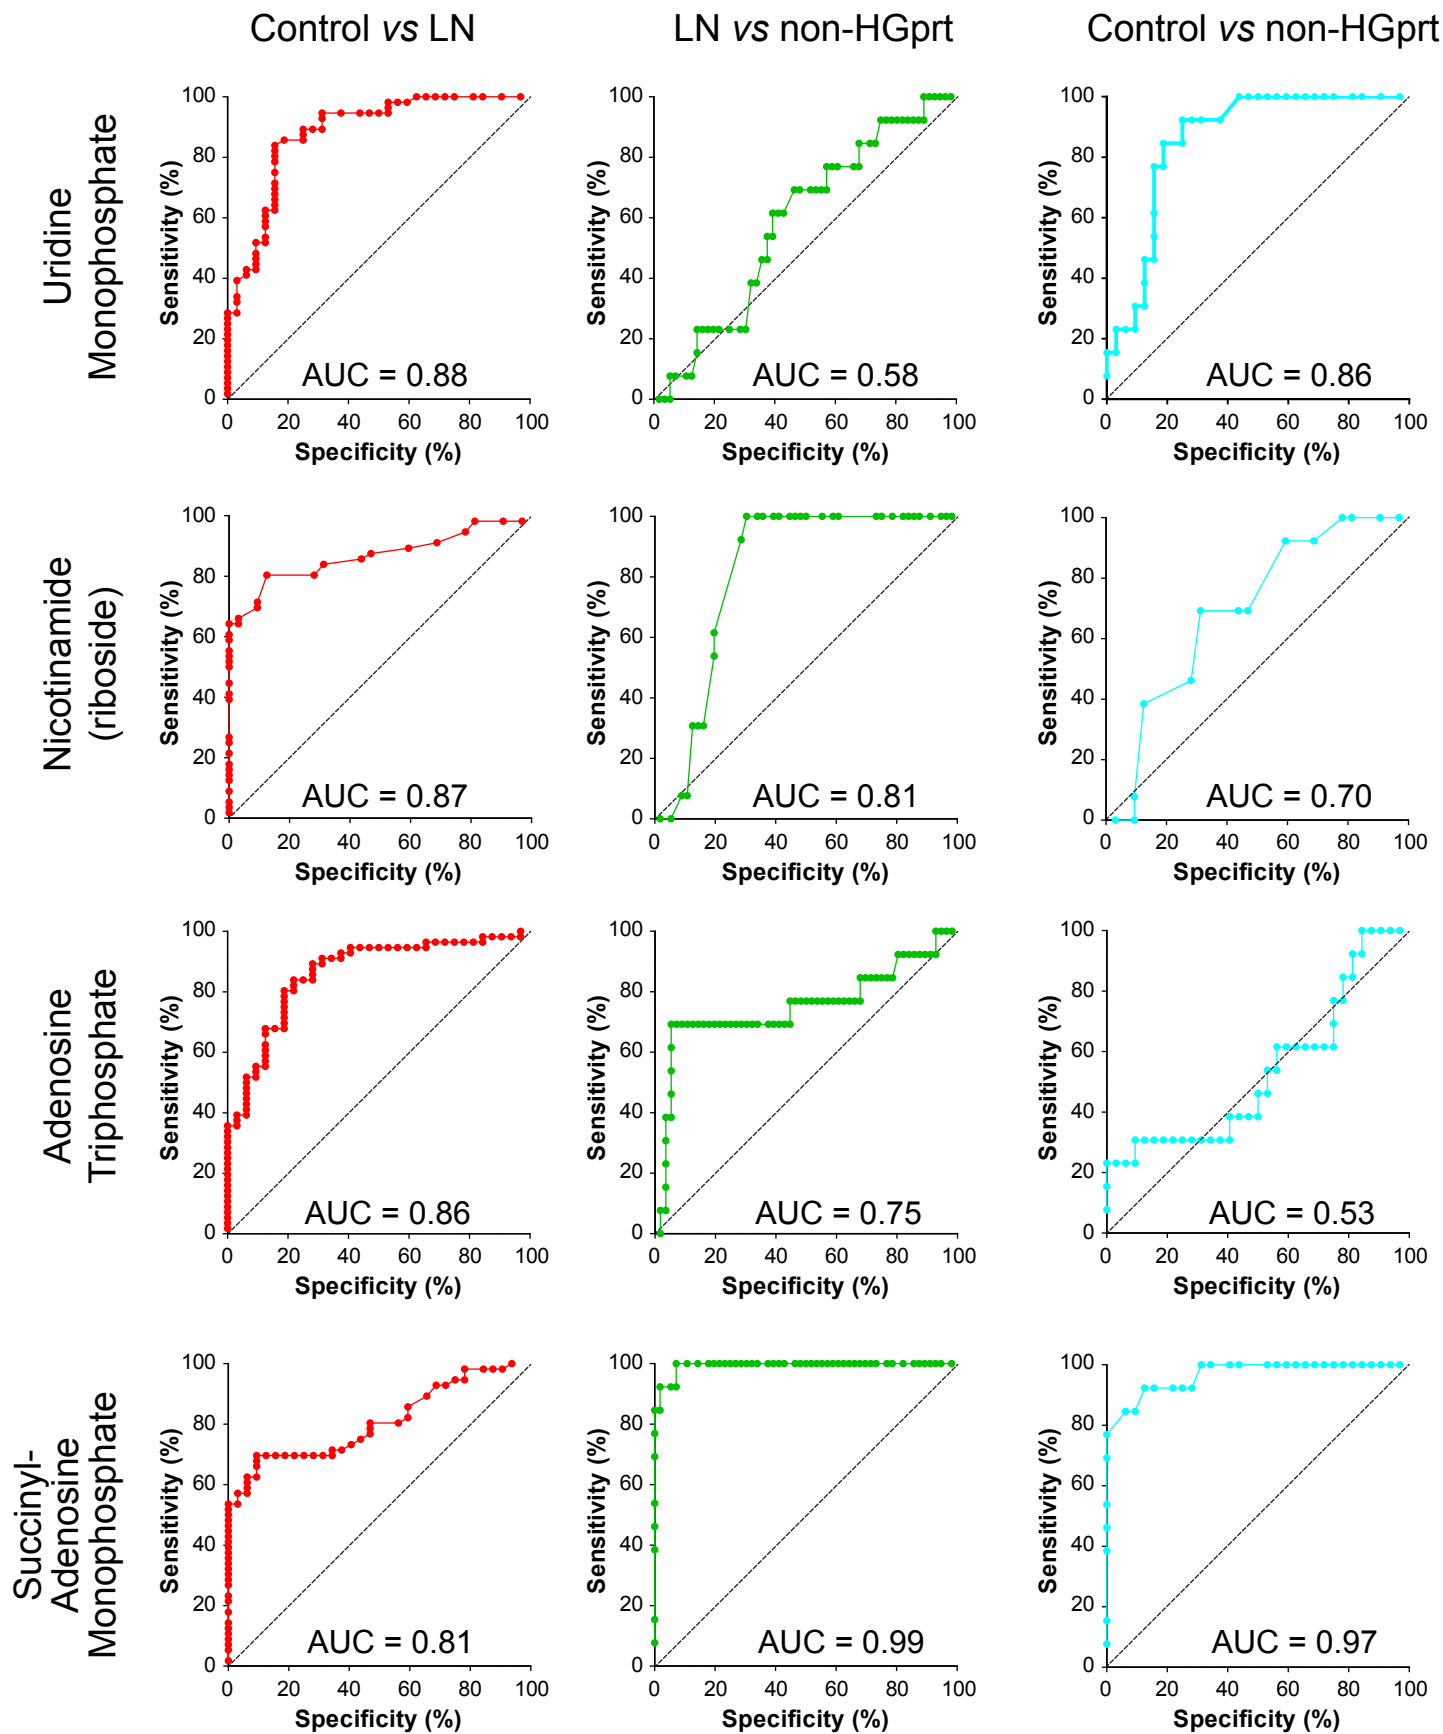

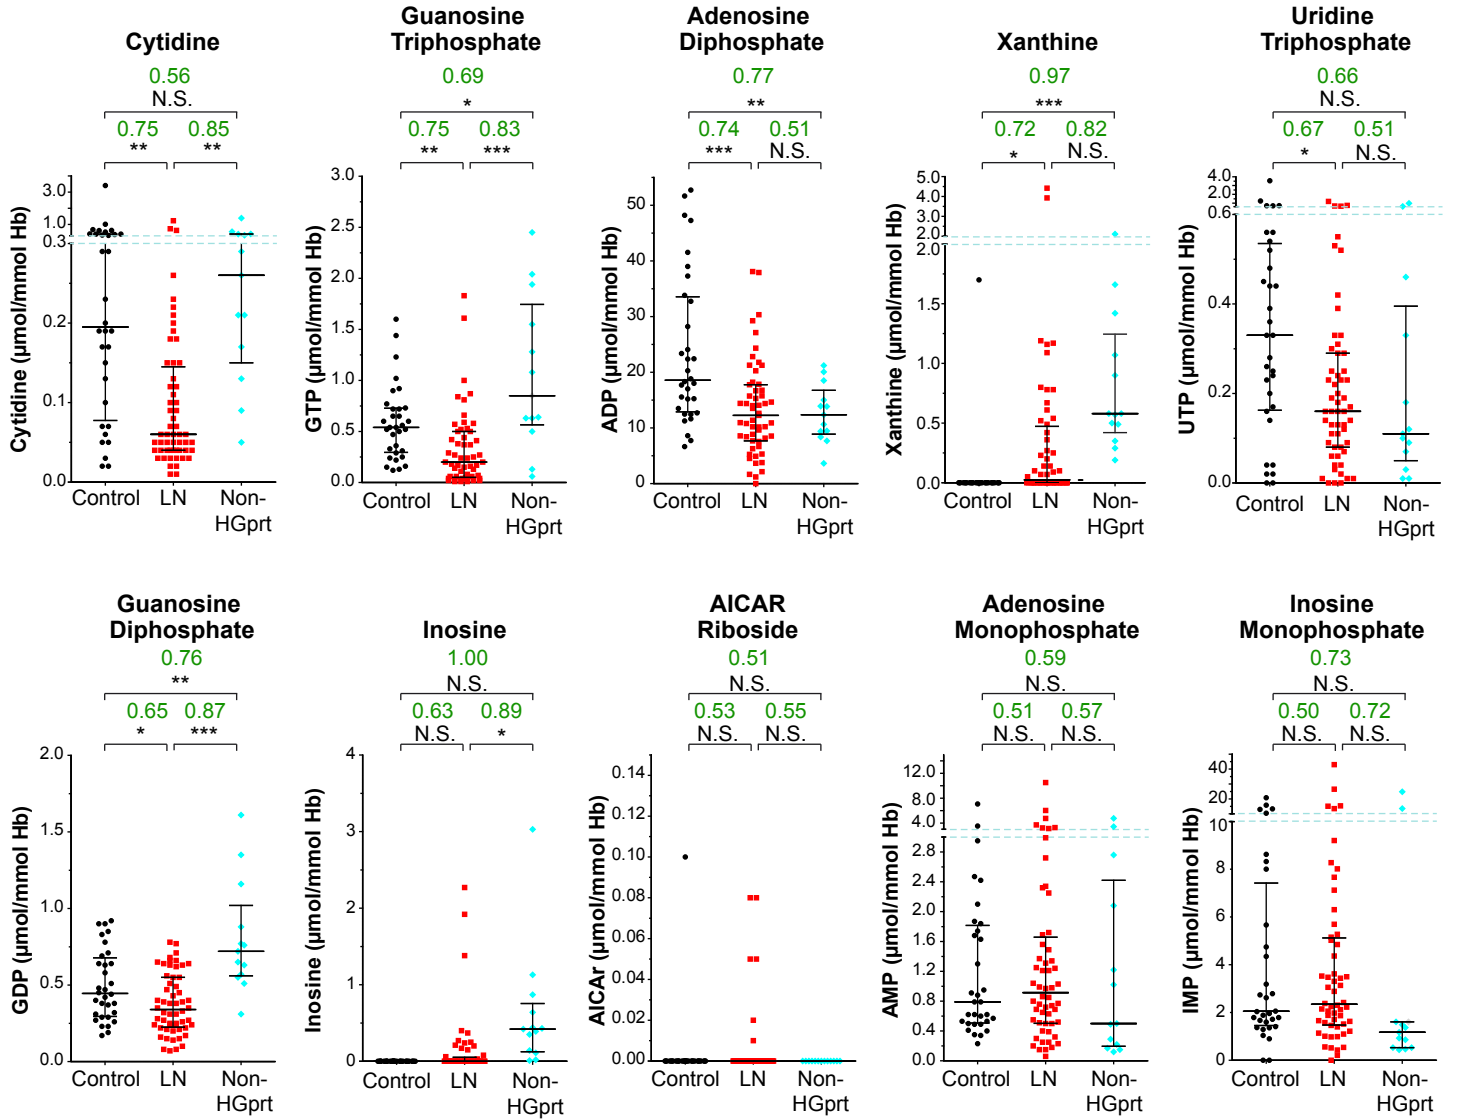



## Supplemental Table 1 (part 2)

### HND patients

|        | ATP   | ADP   | AMP  | GTP  | GDP  | IMP   | Inosine | Hypoxanthine | Xanthine | Zr   | ZMP  | ZTP  | UTP  | UMP  | Cytidine | Nicotinate | Nicotinamide(ribose) | sAMP | HPRT activity | APRT activity |
|--------|-------|-------|------|------|------|-------|---------|--------------|----------|------|------|------|------|------|----------|------------|----------------------|------|---------------|---------------|
| HND 1  | 23,39 | 15,77 | 0,65 | 0,87 | 0,43 | 1,22  | 0,00    | 0,05         | 0,80     | 0,00 | 0,25 | 0,94 | 0,31 | 1,92 | 0,23     | 0,07       | 0,10                 | 0,21 | 0,32          | 1,30          |
| HND 2  | 0,98  | 6,66  | 2,32 | 0,06 | 0,39 | 15,12 | 0,00    | 4,09         | 4,42     | 0,00 | 0,59 | 0,00 | 0,01 | 1,23 | 0,01     | 0,15       | 0,01                 | 0,71 | 0,00          | 1,00          |
| HND 3  | 0,84  | 4,92  | 2,34 | 0,66 | 0,39 | 2,06  | 0,00    | 6,76         | 0,00     | 0,66 | 0,06 | 0,01 | 1,41 | 0,15 | 0,17     | 0,32       | 1,06                 | 0,40 | 1,24          |               |
| HND 4  | 2,31  | 4,52  | 0,25 | 0,24 | 0,49 | 1,14  | 0,00    | 33,20        | 0,23     | 0,00 | 0,96 | 0,53 | 0,08 | 0,80 | 0,05     | 0,19       | 0,28                 | 2,48 | 0,00          | 1,01          |
| HND 5  | 13,24 | 7,57  | 0,20 | 0,37 | 0,35 | 1,66  | 0,00    | 45,53        | 0,25     | 0,00 | 0,89 | 1,72 | 1,19 | 1,37 | 0,06     | 0,26       | 0,50                 | 2,48 | 0,14          | 1,06          |
| HND 6  | 5,44  | 8,17  | 0,72 | 0,29 | 0,40 | 6,31  | 0,00    | 14,73        | 0,00     | 0,00 | 0,55 | 2,29 | 0,16 | 1,04 | 0,09     | 0,22       | 0,25                 | 1,60 | 0             | 0,88          |
| HND 7  | 7,92  | 8,57  | 0,30 | 1,83 | 0,55 | 0,52  | 0,00    | 26,62        | 0,20     | 0,00 | 3,00 | 3,68 | 0,20 | 0,70 | 0,04     | 0,22       | 0,28                 | 1,76 | 0             | 0,95          |
| HND 8  | 1,80  | 11,38 | 4,74 | 0,16 | 0,51 | 13,49 | 0,06    | 1,83         | 0,00     | 0,00 | 0,62 | 1,02 | 0,19 | 1,24 | 0,19     | 0,16       | 0,18                 | 0,38 | 0             | 1,15          |
| HND 9  | 0,49  | 3,78  | 1,21 | 0,03 | 0,56 | 7,67  | 0,21    | 5,27         | 0,00     | 0,00 | 0,27 | 0,19 | 0,02 | 0,85 | 0,09     | 0,13       | 0,12                 | 0,85 | 0             | 1,5           |
| HND 10 | 5,79  | 16,68 | 3,22 | 0,06 | 0,25 | 2,25  | 0,00    | 19,89        | 0,00     | 0,00 | 0,55 | 0,29 | 0,01 | 1,02 | 1,23     | 0,24       | 0,31                 | 1,49 | 0             | 1,21          |
| HND 11 | 18,86 | 18,21 | 1,03 | 0,58 | 0,64 | 3,50  | 0,00    | 15,97        | 0,10     | 0,00 | 0,53 | 2,23 | 0,53 | 1,29 | 0,05     | 0,26       | 0,38                 | 1,54 | 0,01          | 1,15          |
| HND 12 | 8,21  | 10,90 | 0,99 | 0,52 | 0,22 | 0,99  | 0,00    | 1,15         | 0,00     | 0,00 | 0,03 | 0,03 | 0,04 | 0,28 | 0,03     | 0,05       | 0,05                 | 0,22 | <0,1          | 0,8           |
| HND 13 | 16,87 | 29,25 | 3,70 | 0,04 | 0,22 | 0,98  | 0,00    | 1,01         | 0,00     | 0,00 | 0,27 | 0,77 | 0,08 | 1,37 | 0,73     | 0,13       | 0,12                 | 0,20 | 0             | 0,95          |
| HND 14 | 2,81  | 6,28  | 0,50 | 0,08 | 0,27 | 0,54  | 0,00    | 24,12        | 0,78     | 0,00 | 0,63 | 0,63 | 0,09 | 0,82 | 0,05     | 0,18       | 0,20                 | 1,86 | 0,16          | 0,86          |
| HND 15 | 26,69 | 22,81 | 0,40 | 1,00 | 0,40 | 1,10  | 0,00    | 0,38         | 1,19     | 0,00 | 0,35 | 4,25 | 0,19 | 1,76 | 0,04     | 0,12       | 0,17                 | 0,37 | 0             | 0,7           |

### HRH patients

|        | ATP   | ADP   | AMP  | GTP  | GDP  | IMP   | Inosine | Hypoxanthine | Xanthine | Zr   | ZMP  | ZTP  | UTP  | UMP  | Cytidine | Nicotinate | Nicotinamide(ribose) | sAMP | HPRT activity | APRT activity |
|--------|-------|-------|------|------|------|-------|---------|--------------|----------|------|------|------|------|------|----------|------------|----------------------|------|---------------|---------------|
| HRH 1  | 25,60 | 10,17 | 0,23 | 0,18 | 0,28 | 0,56  | 0,20    | 1,64         | 0,00     | 0,00 | 0,03 | 1,45 | 0,06 | 0,79 | 0,04     | 0,04       | 0,35                 | 0,11 | 0             | 0,65          |
| HRH 2  | 2,67  | 8,86  | 1,69 | 0,07 | 0,68 | 5,28  | 0,27    | 21,89        | 3,93     | 0,00 | 0,76 | 0,04 | 1,14 | 2,28 | 0,03     | 0,26       | 0,30                 | 0,44 | 0,2           | 1,16          |
| HRH 3  | 33,38 | 30,34 | 1,72 | 0,59 | 0,45 | 3,53  | 0,00    | 13,03        | 0,54     | 0,00 | 0,10 | 0,07 | 0,33 | 0,91 | 0,26     | 0,21       | 0,24                 | 1,65 | 0,87          | 0,47          |
| HRH 4  | 2,13  | 10,22 | 2,72 | 0,06 | 0,26 | 1,87  | 0,00    | 13,25        | 0,00     | 0,00 | 0,42 | 0,22 | 0,03 | 0,63 | 0,10     | 0,09       | 0,09                 | 1,19 | 0,83          | 0,41          |
| HRH 5  | 6,50  | 14,01 | 1,56 | 0,38 | 0,62 | 5,70  | 0,17    | 20,24        | 0,00     | 0,00 | 1,29 | 2,66 | 0,13 | 1,12 | 0,11     | 0,22       | 0,42                 | 1,71 | <0,1          | 0,9           |
| HRH 6  | 19,78 | 12,63 | 0,50 | 0,15 | 0,15 | 1,40  | 0,00    | 0,19         | 0,00     | 0,00 | 0,08 | 0,05 | 0,06 | 0,64 | 0,05     | 0,06       | 0,24                 | 0,15 | 0             | 0,72          |
| HRH 7  | 12,20 | 10,80 | 0,63 | 0,41 | 0,31 | 3,44  | 0,00    | 5,46         | 0,07     | 0,00 | 0,00 | 0,06 | 0,23 | 0,86 | 0,05     | 0,16       | 0,20                 | 0,75 | 0             | 1,08          |
| HRH 8  | 8,67  | 17,76 | 1,37 | 0,50 | 0,77 | 3,14  | 0,00    | 17,01        | 0,00     | 0,00 | 2,32 | 4,30 | 0,18 | 1,45 | 0,12     | 0,23       | 0,24                 | 0,91 | 0,38          | 1,2           |
| HRH 9  | 21,01 | 21,26 | 0,76 | 0,66 | 8,28 | 0,00  | 7,92    | 0,67         | 0,00     | 0,18 | 0,55 | 0,67 | 1,05 | 0,06 | 0,26     | 0,22       | 1,38                 | 0    | 0,9           |               |
| HRH 10 | 14,73 | 15,30 | 0,86 | 0,02 | 0,16 | 1,88  | 0,00    | 5,73         | 0,61     | 0,00 | 1,10 | 2,25 | 0,25 | 0,76 | 0,13     | 0,12       | 0,12                 | 0,86 | 0,07          | 1,16          |
| HRH 11 | 4,27  | 5,25  | 0,18 | 0,03 | 0,14 | 0,43  | 0,00    | 9,81         | 0,27     | 0,00 | 0,13 | 0,01 | 0,14 | 0,35 | 0,04     | 0,12       | 0,13                 | 1,01 | 0             | 0,83          |
| HRH 12 | 1,11  | 2,15  | 0,25 | 0,11 | 0,65 | 26,50 | 1,92    | 19,60        | 0,36     | 0,00 | 2,85 | 1,21 | 0,11 | 1,04 | 0,10     | 0,17       | 0,31                 | 0,24 | 0,6           | 0,82          |

### Hyperuricemic non-HGPRT deficient patients

|             | ATP   | ADP   | AMP  | GTP  | GDP  | IMP   | Inosine | Hypoxanthine | Xanthine | Zr   | ZMP  | ZTP  | UTP  | UMP  | Cytidine | Nicotinate | Nicotinamide(ribose) | sAMP | HPRT activity | APRT activity |
|-------------|-------|-------|------|------|------|-------|---------|--------------|----------|------|------|------|------|------|----------|------------|----------------------|------|---------------|---------------|
| non-HPRT 1  | 38,53 | 15,02 | 0,49 | 1,28 | 0,55 | 0,53  | 0,39    | 3,72         | 0,29     | 0,00 | 0,00 | 0,00 | 0,12 | 0,72 | 0,40     | 0,04       | 0,07                 | 0,03 | 2,00          | 0,58          |
| non-HPRT 2  | 2,13  | 10,64 | 3,42 | 0,06 | 0,76 | 0,93  | 0,42    | 14,21        | 1,42     | 0,00 | 0,00 | 0,00 | 0,01 | 1,36 | 0,33     | 0,06       | 0,13                 | 0,19 | 2,10          | 0,42          |
| non-HPRT 3  | 30,63 | 20,07 | 1,22 | 0,85 | 0,65 | 1,61  | 0,02    | 4,46         | 0,35     | 0,00 | 0,00 | 0,00 | 0,18 | 0,95 | 0,55     | 0,05       | 0,07                 | 0,02 | 2,20          | 0,47          |
| non-HPRT 4  | 31,56 | 12,36 | 0,50 | 1,94 | 0,77 | 1,49  | 0,35    | 5,06         | 0,58     | 0,00 | 0,00 | 0,00 | 0,62 | 0,56 | 0,29     | 0,04       | 0,10                 | 0,07 | 2,30          | 0,54          |
| non-HPRT 5  | 34,76 | 21,21 | 1,02 | 1,08 | 0,51 | 1,61  | 0,01    | 0,11         | 0,19     | 0,00 | 0,00 | 0,00 | 0,07 | 0,70 | 0,21     | 0,05       | 0,05                 | 0,01 | 2,20          | 0,39          |
| non-HPRT 6  | 5,31  | 13,86 | 2,76 | 0,63 | 1,16 | 13,57 | 3,03    | 14,39        | 0,58     | 0,00 | 0,00 | 0,00 | 0,03 | 1,19 | 0,41     | 0,06       | 0,12                 | 0,09 | 2,20          | 0,44          |
| non-HPRT 7  | 0,39  | 3,64  | 4,76 | 0,13 | 0,72 | 24,77 | 0,87    | 12,89        | 0,50     | 0,00 | 0,00 | 0,00 | 0,01 | 0,91 | 0,26     | 0,05       | 0,12                 | 0,06 | 2,00          | 0,6           |
| non-HPRT 8  | 26,76 | 9,46  | 0,15 | 1,55 | 0,63 | 0,53  | 0,64    | 5,62         | 0,49     | 0,00 | 0,00 | 0,00 | 0,11 | 0,86 | 0,21     | 0,05       | 0,10                 | 0,05 | 2,30          | 0,48          |
| non-HPRT 9  | 31,36 | 8,38  | 0,17 | 0,50 | 0,31 | 0,44  | 1,13    | 8,36         | 0,57     | 0,00 | 0,00 | 0,00 | 0,10 | 0,86 | 0,05     | 0,05       | 0,12                 | 0,03 | 2,24          | 0,49          |
| non-HPRT 10 | 40,30 | 7,68  | 0,12 | 0,63 | 0,57 | 0,47  | 0,44    | 4,89         | 1,66     | 0,00 | 0,00 | 0,00 | 0,33 | 1,43 | 0,09     | 0,05       | 0,10                 | 0,06 | 2,53          | 0,49          |
| non-HPRT 11 | 10,64 | 18,51 | 2,08 | 0,64 | 1,35 | 1,37  | 0,14    | 10,44        | 1,07     | 0,00 | 0,00 | 0,00 | 0,09 | 1,04 | 0,17     | 0,05       | 0,12                 | 0,12 | 2,50          | 0,36          |
| non-HPRT 12 | 36,01 | 9,40  | 0,22 | 2,04 | 0,88 | 0,86  | 0,11    | 3,98         | 0,90     | 0,00 | 0,00 | 0,00 | 0,98 | 1,00 | 0,13     | 0,05       | 0,07                 | 0,04 | 2,20          | 0,47          |
| non-HPRT 13 | 37,14 | 13,92 | 0,29 | 2,45 | 1,61 | 1,17  | 0,43    | 5,38         | 2,11     | 0,00 | 0,00 | 0,00 | 0,46 | 2,26 | 1,39     | 0,05       | 0,11                 | 0,03 | 3,00          | 0,43          |

Untreated patients      Allopurinol treated patients

### Abbreviation used

ATP : Adenosine 5'-triphosphate      GTP : Guanosine 5'-triphosphate      ZTP : AICAR 5'-triphosphate      UTP : Uridine 5'-triphosphate  
ADP : Adenosine 5'-diphosphate      GDP : Guanosine 5'-diphosphate      ZMP : AICAR 5'-monophosphate      UMP : Uridine 5'-monophosphate  
AMP : Adenosine 5'-monophosphate      IMP : Inosine 5'-monophosphate      Zr : AICAR riboside      sAMP : Succinyl-adenosine 5'-monophosphate

HGprt and Aprt enzymatic activities were measured in red blood cell lysates using radiolabeled 14C-hypoxanthine or 14C-adenine as described in the following references

#### Refs:

Cartier P, Hamet M. Purine phosphoribosyltransferase activity of human erythrocytes: technic of determination. Clin Chim Acta 1968, 20: 205-14.  
Aral B, de Saint Basile G, Al-Garawi S, Kamoun P, Ceballos-Picot I. Novel nonsense mutation in the hypoxanthine guanine phosphoribosyltransferase gene and non-random X-inactivation causing Lesch-Nyhan syndrome in a female patient. Hum Mutat 1996; 7: 52-8.
